# Supplementary material
Source: publisher site journal article supplement (https://static.cambridge.org/content/id/urn:cambridge.org:id:article:S104719871600005X/resource/name/S104719871600005Xsupp001.zip)
Supplement: Supplementary file 2 [file S104719871600005Xsupp001.zip]

Archive with 1 entries (1 files):
- online appendix_REVISED.pdf
